# Supplementary material for: Preliminary efficacy of cognitive-behavioral therapy on emotion regulation in adults with autism spectrum disorder: A pilot randomized waitlist-controlled study
Source: PLoS One. 2022 Nov 23;17(11):e0277398. doi: 10.1371/journal.pone.0277398 (PMC9683545; doi:10.1371/journal.pone.0277398)
Supplement: S5 File — (XLSX) [file pone.0277398.s005.xlsx]

## Sheet: data
S5. Minial underlying data set
ID	Group	Sex	DSM-Ⅳ subtype	Comorbid disorder	Medication	Age	IQ			ADOS		ADI-R			CISS									TAS												MPMR			ASD-Q						GAF			QOL
							IQ(Full)	IQ(Verbal)	IQ(Performance)	ADOS(Communication)	ADOS(Social interaction)	ADI-R(Social interaction)	ADI-R(Communication)	ADI-R(Restricted interest)	CISS-T	CISS-E	CISS-A	CISS-T	CISS-E	CISS-A	CISS-T	CISS-E	CISS-A	TAS20-F1	TAS20-F2	TAS20-F3	TAS20-Total	TAS20-F1	TAS20-F2	TAS20-F3	TAS20-Total	TAS20-F1	TAS20-F2	TAS20-F3	TAS20-Total				ASD-Q(knowledge)	ASD-Q(Attitude)	ASD-Q(knowledge)	ASD-Q(Attitude)	ASD-Q(knowledge)	ASD-Q(Attitude)
															pre			post			FU			pre				post				FU				pre	post	FU	pre		post		FU		pre	post	FU	pre	post
2001	CBT	Male	Au	Available	Available	36	113	119	104	6	10	16	13	4	51	70	30	40	67	25	35	62	27	26	23	25	68	24	20	25	63	26	18	24	72	60.97	78.05	73.17	8	19	7	19	7	21	35	41	42	2.03846	1.76923
2002	CBT	Female	Asp	Available	None	29	96	103	87	3	5	5	0	3	66	41	59	45	54	43	46	48	38	27	23	29	75	27	25	18	74	29	25	19	73	65.85	65.85	68.29	7	23	10	25	10	25	48	49	55	3.42308	3.19231
2003	CBT	Female	Au	None	None	25	118	110	125	3	8	17	12	0	52	64	34	52	48	33	53	54	34	26	22	26	70	26	21	21	70	24	22	22	70	82.92	82.93	80.49	8	17	9	18	9	17	55	58	60	2.80769	3.11538
2004	WL	Female	Au	Available	None	30	118	116	116	3	7	12	11	4	73	56	24	75	42	58	78	44	38	14	11	15	52	13	11	14	54	19	13	14	60	70.73	63.41	53.66	7	19	7	15	9	18	48	51	50	3.61538	4
2005	CBT	Female	NOS	Available	Available	43	118	129	99	1	6	.	.	.	60	56	38	63	58	36	58	43	33	.	.	.	.	29	15	17	73	24	14	16	66	78.04	80.49	85.37	8	19	6	19	9	15	30	35	40	2.57692	2.42308
2006	WL	Male	NOS	None	None	46	118	120	112	7	10	.	.	.	56	43	22	55	41	23	55	46	22	12	21	22	55	9	21	22	52	9	23	24	50	78.04	68.29	75.61	9	17	10	17	9	19	60	43	43	3.46154	3.26923
2007	WL	Male	NOS	Available	Available	37	89	99	79	3	9	.	.	.	71	34	25	66	43	25	71	43	24	28	21	21	76	28	25	19	74	33	25	17	81	41.46	58.54	51.22	7	24	7	22	7	21	38	42	47	1.96154	2.15385
2008	WL	Male	Au	None	None	24	90	97	83	5	8	12	7	3	28	30	20	34	26	20	34	26	20	7	16	15	38	12	22	15	47	16	20	16	56	56.09	65.85	70.73	8	21	10	21	10	21	48	40	45	1.92308	1.69231
2009	WL	Male	Asp	Available	Available	27	117	117	113	4	7	3	2	1	50	64	33	51	63	33	63	57	36	21	21	23	65	26	23	16	69	24	20	14	74	68.29	80.49	78.05	5	17	4	6	4	12	35	39	44	2.42308	2.96154
2010	CBT	Female	Au	None	Available	44	105	104	105	2	9	12	11	5	45	53	37	47	43	35	41	35	33	24	20	23	63	18	15	24	55	19	20	22	59	65.85	60.98	82.93	5	18	9	20	8	18	32	39	43	2.57692	2.57692
2011	CBT	Male	Asp	Available	None	33	134	151	110	2	7	.	.	.	60	53	44	71	48	49	75	42	47	29	16	20	65	26	16	15	69	21	13	15	63	82.93	90.24	87.8	8	16	9	15	9	18	41	64	75	2.96154	3.96154
2012	CBT	Male	Au	None	Available	29	93	93	96	5	9	29	24	8	54	43	37	50	27	44	57	24	49	22	21	33	66	10	21	26	55	9	17	26	50	56.1	65.85	70.73	10	10	9	14	8	12	51	69	78	3.76923	3.53846
2013	WL	Male	Au	None	None	26	118	121	110	3	9	12	8	4	38	50	20	41	47	26	42	46	27	25	25	17	71	27	23	16	72	22	23	15	64	73.17	87.8	95.12	9	24	6	20	8	20	41	58	68	2.80769	2.92308
2014	WL	Male	Au	None	None	21	108	114	99	2	3	19	11	3	50	56	56	44	46	48	49	52	40	24	16	20	70	22	17	19	66	20	15	20	59	87.8	82.93	87.8	7	15	8	16	9	19	50	42	43	2.73077	2.61538
2015	CBT	Female	NOS	Available	None	27	97	92	105	1	5	7	8	2	60	50	52	62	53	57	52	47	64	17	18	17	62	24	18	16	76	30	21	19	80	73.17	95.12	78.05	8	21	8	23	9	19	61	60	52	4.07692	3.76923
2016	WL	Female	Asp	Available	None	42	112	112	110	2	5	6	3	3	62	58	32	57	63	31	55	64	32	27	19	21	65	27	19	19	69	29	19	20	68	80.49	85.37	82.93	10	18	10	18	10	16	41	32	48	1.73077	2.30769
2017	WL	Male	Au	None	Available	36	91	89	95	4	10	25	18	3	38	46	31	44	72	24	64	72	40	33	23	16	76	35	25	16	80	35	21	20	88	60.98	70.73	60.98	10	23	10	25	9	21	45	41	42	3.19231	1.30769
2018	WL	Female	Au	Available	Available	25	100	110	87	4	5	13	7	1	.	.	.	38	70	53	35	67	58	29	23	20	72	30	25	22	75	31	24	23	74	58.54	68.29	68.29	5	20	9	20	9	19	51	42	43	.	2.34615
2019	WL	Female	Au	Available	Available	24	89	97	82	3	4	8	6	4	44	61	57	41	56	51	46	61	52	26	24	19	75	17	20	24	65	13	18	26	61	70.73	63.41	68.29	7	17	8	21	6	22	50	64	49	2.11538	1.88462
2026	WL	Male	NOS	Available	Available	20	119	121	112	6	8	.	.	.	54	41	28	56	38	28	57	42	29	15	17	19	55	17	19	20	60	19	19	20	62	60.98	58.54	63.41	9	12	9	12	9	13	60	60	52	3.03846	2.92308
2025	CBT	Male	NOS	Available	Available	42	89	100	78	3	6	.	.	.	28	64	42	38	59	45	36	55	42	25	23	25	71	27	18	21	68	24	18	23	67	29.27	75.61	92.68	7	14	8	17	10	19	50	62	52	2.30769	2.69231
2024	CBT	Male	NOS	Available	Available	49	99	102	95	5	7	.	.	.	69	69	70	.	.	.	57	62	55	14	8	12	50	.	.	.	.	21	10	12	59	63.41	85.37	80.49	7	21	10	18	8	19	52	51	52	2.38462	.
2023	WL	Female	NOS	None	Available	46	120	120	116	3	7	.	.	.	52	59	57	50	56	50	47	59	45	24	16	21	67	21	16	21	62	27	17	24	70	68.29	82.93	87.8	10	20	7	18	9	19	42	50	51	2.26923	2.42308
2021	CBT	Male	Au	None	Available	33	105	120	84	4	7	11	8	2	53	58	35	58	58	55	56	52	59	25	18	23	68	21	20	23	66	15	13	16	52	73.17	82.93	90.24	5	18	5	19	6	17	40	56	62	3.23077	3.23077
2022	CBT	Male	NOS	Available	Available	21	105	103	106	3	9	.	.	.	37	57	27	52	42	45	35	51	29	30	18	25	71	20	13	19	60	24	19	23	68	58.54	63.41	63.41	7	16	9	15	8	15	51	57	62	3.53846	4.19231
2020	CBT	Male	Au	None	Available	36	97	112	79	4	7	13	14	6	40	40	46	61	54	47	42	49	48	28	20	23	73	26	20	25	71	28	22	26	72	80.49	70.73	73.17	9	18	10	23	9	17	55	61	58	2.84615	2.61538
1028	CBT	Female	NOS	None	Available	38	114	105	122	4	7	.	.	.	45	42	58	61	36	43	51	36	47	26	8	14	68	30	16	13	77	33	20	15	80	63.41		56.1	10	21	10	22	10	21	35	49	51	3.73077	3.57692
1048	CBT	Male	Au	None	None	26	110	116	99	4	9	12	12	3	54	52	43	55	43	37	56	50	43	8	13	14	45	8	13	15	44	9	12	15	44	82.93	90.24	85.37	9	16	10	21	10	19	38	50	57	3.11538	3.5
1024	WL	Male	Au	None	None	20	111	106	114	3	5	19	16	5	52	53	52	44	46	46	43	44	52	20	17	23	66	12	19	23	54	10	11	21	46	75.61	78.05	73.17	8	22	10	20	10	20	41	62	55	3.42308	3.65385
1049	CBT	Female	Au	None	None	26	102	112	88	4	7	7	4	3	71	35	35	75	42	37	54	22	16	15	17	13	57	13	11	17	45	15	13	28	36	53.66	51.22	65	7	21	7	25	5	21	45	43	54	3.61538	3.5
1050	WL	Male	Au	None	None	35	111	120	98	5	8	16	10	4	49	52	40	48	49	32	47	51	34	21	20	22	63	29	19	20	78	27	19	21	71	78.05	78.05	78.05	7	17	8	16	7	18	54	52	53	3.69231	3.5
1047	WL	Male	Au	None	Available	39	88	106	66	3	9	.	.	.	40	66	33	37	68	45	42	64	41	23	21	23	65	23	19	20	66	23	19	19	67	60.98	48.78	60.98	9	19	10	19	10	20	42	45	52	2.40308	2.69231
1015	CBT	Female	Au	None	Available	40	117	119	110	1	7	4	6	4	45	53	48	46	50	53	61	51	60	26	18	19	67	24	17	19	66	18	10	15	55	92.68	85.37	92.68	8	23	7	23	9	23	48	41	52	2.46154	2.80769
1042	WL	Male	NOS	None	Available	35	111	121	97	4	7	.	.	.	34	54	34	41	54	37	.	.	.	31	24	29	72	32	21	28	71	31	24	25	76	87.8	90.24	90.24	10	17	10	21	10	15	28	38	42	1.84615	2.19231
1020	CBT	Male	Au	None	Available	35	107	119	90	5	8	24	14	6	59	59	66	.	.	.	.	.	.	8	11	22	43	.	.	.	.	.	.	.	.	70.73			10	21	.	.	.	.	31			3.96154	.
2036	CBT	Female	Au	Available	None	28	112	120	100	3	6	9	9	2	54	45	56	.	.	.	.	.	.	22	12	20	64	.	.	.	.	.	.	.	.	78.05			10	21	.	.	.	.	60			3.84615	.
2027	WL	Male	Au	Available	Available	18	123	123	117	3	9	19	11	6	.	.	.	32	46	30	40	54	31	23	17	25	67	26	23	22	69	24	19	24	71	82.93	90.24	90.24	6	17	5	17	6	15	34	49	54	2.80769	2.80769
2030	WL	Male	Au	Available	Available	33	94	97	92	3	7	15	11	1	61	54	39	64	56	24	65	49	44	27	18	16	75	9	11	14	52	11	9	12	44	39.02	87.8	87.8	6	20	4	25	4	25	42	41	50	2.76923	4
2035	WL	Female	Au	None	None	20	93	97	88	6	10	13	8	3	80	28	31	80	36	28	80	31	25	34	25	14	83	35	23	18	86	34	18	18	78	56.1	39.02	58.54	8	24	7	22	8	21	38	51	42	3.07692	3.84615
2032	WL	Female	Au	Available	Available	24	89	102	75	3	7	10	8	4	62	42	36	64	48	42	73	33	32	24	18	16	62	28	19	18	73	27	21	16	74	70.73	80.49	80.49	10	18	10	21	10	21	40	50	56	2.38462	2.88462
2028	CBT	Male	NOS	Available	Available	30	112	101	125	2	5	.	.	.	49	71	61	50	65	57	50	64	58	29	25	20	80	30	22	22	78	31	22	20	83	90.24	95.12	92.68	10	17	10	16	10	18	52	60	65	2.38462	2.53846
2029	CBT	Male	Au	None	Available	21	91	103	78	3	4	17	11	5	50	52	40	52	55	38	57	53	41	18	20	23	61	24	18	25	67	17	20	23	62	65.85	63.41	68.29	8	14	10	13	10	16	49	57	53	2.34615	2.42308
2031	CBT	Male	Au	Available	Available	19	142	156	119	4	7	14	14	2	58	42	45	.	.	.	58	53	60	27	24	23	70	.	.	.	.	22	17	24	61	60.98	82.93	87.8	8	19	9	25	7	25	50	50	62	2.92308	.
2034	WL	Male	Au	None	Available	22	114	122	99	3	9	6	5	2	35	46	43	18	44	21	19	50	25	22	19	24	65	26	21	22	67	28	23	23	74	85.37	87.8	92.68	0	15	6	7	8	10	42	39	47	3.26923	3
2033	CBT	Female	Au	Available	Available	35	95	106	82	2	7	8	6	4	.	.	.	41	66	41	40	63	45	35	23	19	77	34	22	18	80	32	22	20	78	87.8	92.68	82.93	8	25	10	24	10	25	35	42	48	2.88462	3.03846
1054	CBT	Male	Au	Available	Available	49	118	122	109	2	5	6	6	4	37	67	38	46	60	32	41	60	38	29	16	24	71	26	17	23	70	27	17	23	67	92.68	90.24	75.61	6	18	6	18	5	18	31	54	52	.	2.19231
1051	CBT	Male	Au	None	Available	32	107	110	103	4	10	16	13	3	37	64	51	43	58	55	61	59	51	25	21	31	67	22	20	23	69	18	12	31	57	58.54	80.49	70.73	10	21	10	24	10	21	32	48	58	3.23077	3.30769
1052	CBT	Male	NOS	None	None	46	124	112	137	2	5	.	.	.	61	26	40	59	30	42	58	26	37	7	14	22	45	7	11	22	42	7	18	20	41	75.61	85.37	92.68	8	13	5	13	8	15	52	54	62	4.11538	3.92308
1053	WL	Male	Au	None	None	26	107	103	110	3	9	13	8	5	37	44	30	43	49	35	46	50	44	18	18	26	64	18	18	22	62	19	19	24	66	63.41	60.98	60.98	6	20	6	20	8	20	35	43	58	2.84615	2.23077
1055	CBT	Male	Au	Available	Available	28	120	123	110	5	8	10	10	1	37	43	21	31	28	24	47	29	30	17	18	23	58	15	17	19	59	14	18	22	52	51.22	48.78	60.98	9	19	8	22	7	18	32	51	57	2.38462	3.15385
1056	WL	Male	NOS	Available	Available	28	89	105	70	2	6	7	3	1	44	60	43	27	59	30	27	54	32	22	24	30	68	26	23	22	71	22	21	30	67	82.93	90.24	85.37	10	12	10	13	10	15	48	59	64	1.92308	1.73077
1057	WL	Female	Au	Available	Available	28	97	104	88	3	8	14	10	1	57	59	41	51	60	37	51	61	38	26	18	15	69	23	22	17	76	22	19	23	72	46.34	65.85	63.41	10	22	10	22	10	25	43	46	50	2.61538	2.76923
1058	WL	Male	Au	None	Available	28	114	107	119	3	6	17	16	6	65	53	32	70	50	30	75	56	37	23	22	22	67	22	21	20	65	26	20	22	68	68.29	73.17	73.17	5	21	7	15	6	22	36	53	61	3.30769	3.53846
2037	WL	Male	Au	Available	Available	34	110	110	109	2	6	3	7	6	53	63	49	42	45	46	37	43	41	23	18	17	68	23	19	22	68	23	23	22	68	73.17	65.85	68.29	7	21	10	21	8	20	41	50	54	2.5	3.11538
2038	CBT	Male	NOS	Available	Available	29	130	134	120	2	6	3	2	2	51	45	52	57	48	46	58	47	36	21	13	15	63	14	11	12	53	15	11	16	54	68.29	78.05	82.93	9	19	10	20	9	19	42	57	53	3.42308	3.76923
2039	WL	Male	NOS	None	None	40	94	102	84	2	5	.	.	.	40	44	38	51	59	54	41	48	39	20	20	21	61	28	22	16	68	28	18	20	64	56.1	60.98	63.41	6	11	5	17	6	13	60	56	58	2.34615	1.69231
2040	CBT	Male	Au	Available	None	31	104	110	95	4	8	11	8	3	56	53	54	57	55	52	62	55	60	21	15	17	61	18	16	14	58	20	17	18	63	78.05	78.05	80.49	9	19	10	18	10	22	52	46	57	3.69231	3.73077
2041	WL	Male	Au	Available	Available	24	107	110	102	4	9	7	7	3	55	55	37	48	58	28	53	57	20	29	18	20	81	29	21	23	81	33	20	22	83	19.51	21.95	24.39	10	24	10	25	10	25	45	48	50	2.15385	1.76923
2042	CBT	Female	Au	Available	Available	29	117	121	108	3	5	11	6	0	47	67	53	38	62	53	38	55	58	22	15	18	61	25	16	17	64	21	13	17	59	60.98	75.61	80.49	8	15	9	18	9	17	45	62	63	2.57692	3
2043	CBT	Male	Au	Available	None	23	125	131	112	3	8	14	11	3	42	56	40	48	56	40	51	57	39	18	20	18	56	15	18	19	58	20	17	20	63	60.98	68.29	92.68	1	18	9	17	6	20	51	52	59	3.15385	3.19231
Abbreviations: CBT, cognitive-behavioral therapy; WL, waitlist; DSM-IV, Diagnostic and Statistical Manual of Mental Disorders, Fourth Edition; Au, autistic disorder; Asp, Asperger's disorder; Nos, pervasive developmental disorder not otherwise specified; IQ, intelligence quotient; ADOS, Autism Diagnostic Schedule; ADI-R, Autism Diagnostic Interview, Revised; Pre, pre-intervention; Post, post-inte…
[truncated: 24 more columns]
